# Supplementary material for: Graphene oxide sheets-induced growth of nanostructured Fe3O4 for a high-performance anode material of lithium ion batteries
Source: Royal Society of Chemistry journal article supplement (doi:10.1039/c5ta01617g), 2015-01-01
Supplement: c5ta01617g1.pdf [file c5ta01617g1.pdf]

Electronic Supplementary Information (ESI) available:

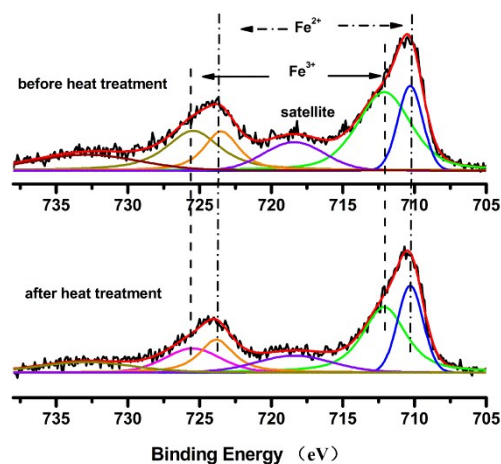

Figure S1. Fe 2p XPS spectra of  $\text{Fe}_3\text{O}_4/\text{GS}$  before and after heat treatment

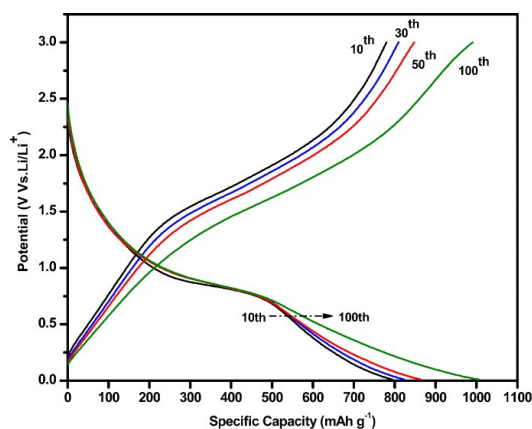

Figure S2. The specific capacity-potential curves of 10<sup>th</sup>, 50<sup>th</sup>, 100<sup>th</sup> and 150<sup>th</sup> for the  $\text{Fe}_3\text{O}_4/\text{GS}$  at a current density of 0.5 A  $\text{g}^{-1}$ .

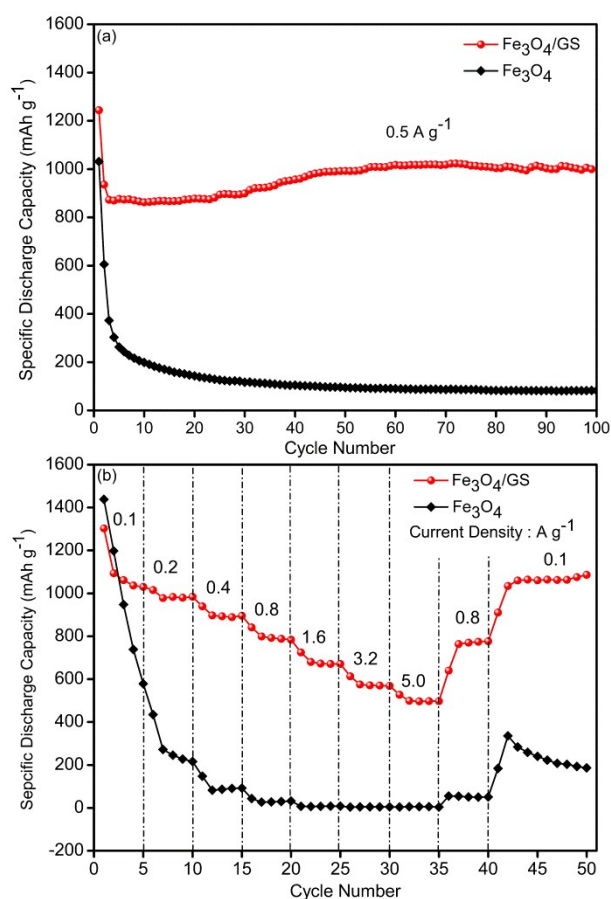

**Figure S3** the test electrode is prepared with a weight ratio of 80:10:10 for active material, acetylene black and binder, respectively. Cycling performance (a) 0.5 A g<sup>-1</sup> and Rate Capability (b) at various current densities are shown.

**Table S1.** Comparison of electrochemical performance of Fe<sub>3</sub>O<sub>4</sub>/GS with the other reported iron oxide/ carbon composites

| Sample                                                     | Current<br>(mA g <sup>-1</sup> ) | Cycles<br>(N) | Capacity<br>(mAh g <sup>-1</sup> ) | Ref. |
|------------------------------------------------------------|----------------------------------|---------------|------------------------------------|------|
| Fe <sub>3</sub> O <sub>4</sub> /GS                         | 500                              | 175           | 1002                               | This |
| $\alpha$ -Fe <sub>2</sub> O <sub>3</sub> /Carbon nanofiber | 500                              | 100           | 288                                | (40) |
| $\gamma$ -Fe <sub>2</sub> O <sub>3</sub> /Carbon nanofiber | 50                               | 40            | 837                                | (3)  |
| Fe <sub>3</sub> O <sub>4</sub> /CNTs microspheres          | 390                              | 100           | 840                                | (41) |
| Fe <sub>3</sub> O <sub>4</sub> /carbon coating             | 500                              | 50            | 976                                | (42) |
| rGO/Fe <sub>2</sub> O <sub>3</sub>                         | 500                              | 100           | 690                                | (43) |
| Fe <sub>3</sub> O <sub>4</sub> /C                          | 100                              | 40            | 1000                               | (18) |
| Fe <sub>2</sub> O <sub>3</sub> @PANI                       | 100                              | 100           | 893                                | (45) |
| Fe <sub>2</sub> O <sub>3</sub> /CNT/graphene               | 372                              | 100           | 620                                | (46) |
| Fe <sub>3</sub> O <sub>4</sub> @CNTs                       | 100                              | 145           | 656                                | (47) |

**Table S2** Comparison of Nyquist plots of Fe<sub>3</sub>O<sub>4</sub>/GS and Fe<sub>3</sub>O<sub>4</sub> after 5 cycles and 50 cycles

| Sample                             | R <sub>(sf+ct)</sub> (Ω)<br>after 5 cycles | R <sub>(sf+ct)</sub> (Ω)<br>after 50 cycles |
|------------------------------------|--------------------------------------------|---------------------------------------------|
| Fe <sub>3</sub> O <sub>4</sub> /GS | 18.3                                       | 14.6                                        |

Fe<sub>3</sub>O<sub>4</sub>

106.6

46.5

---
